# Supplementary material
Source: publisher figshare collection journal article supplement (https://gsapubs.figshare.com/ndownloader/files/27269405)
Supplement: Supplementary file 1 [file 27269405]

## Sheet: Sheet1
Table DR4. Parageneses of analysed specimens and corresponding GPS coordinates from the Swat region.
Spec.		Grt	Qz	Pl	Bt	Ms	Qz	Ttn	Ilm	Tr		GPS coordinates
H37		x	x	x	x	x	x	x	-	x		N 34° 35' 7.9"; E 72° 6' 31.0"
H65		x	x	x	x	x	x	x	x	x		N 34° 36' 19.6"; E 72° 17' 31.9"
Abbrevations after Whitney and Evans (2010).
(x): present; (-): absent

## Sheet: G48803
Soret, M., et al., 2021, How Himalayan collision stems from subduction: Geology, v. 49, https://doi.org/10.1130/G48803.1
